# Supplementary material for: Hepatic Insulin Resistance Model in the Male Wistar Rat Using Exogenous Insulin Glargine Administration
Source: MDPI journal article supplement (doi:10.3390/metabo13040572), 2023-04-18
Supplement: s1 [file s1]

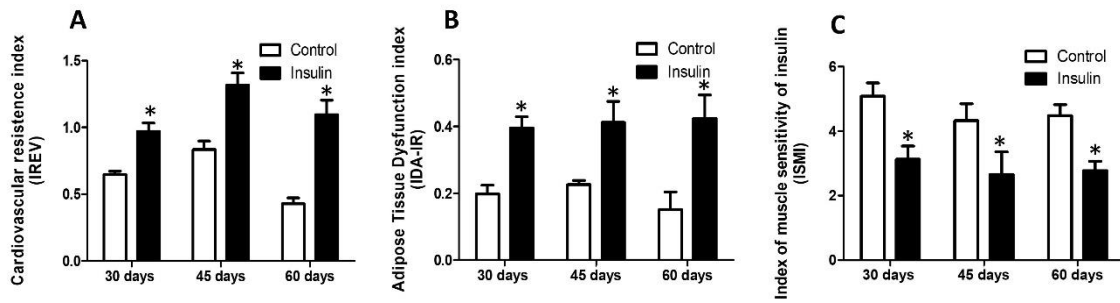

**Figure S1. Tissues-Specific Insulin Sensitivity and Resistance Indexes. A) ISMI. B) IDA-IR. C) IRIEV).** The results shown are the average of 10 different experiments  $\pm$  SEM. A and C graphs were analyzed by a Two-way ANOVA followed by a Bonferroni test. (\*) Indicates a significant difference regarding the control group. **ISMI**, Muscle insulin sensitivity index; **IDA-IR**, Insulin resistance adipocyte dysfunction; **IRCV**, Index Cardiovascular Insulin Resistance.
